# Supplementary material for: Microwave irradiation synthesis of CoFe2O4/rGO to activate peroxymonosulfate for the degradation of 2-aminobenzothiazole in water
Source: Royal Society of Chemistry journal article supplement (doi:10.1039/d4ew00459k), 2024-01-01
Supplement: d4ew00459k1.pdf [file d4ew00459k1.pdf]

**Traditional method for synthesis of cobalt ferrite NMPs:**

An aliquot of 2.712 g of  $\text{FeCl}_3 \cdot 6\text{H}_2\text{O}$  and 1.673g of  $\text{Co}(\text{acac})_2$  were dissolved into 100.0 mL DMF: EG (v/v=1:3). The pH value of the mixture was adjust to 10.0 by  $\text{NH}_3 \cdot \text{H}_2\text{O}$  under  $\text{N}_2$ . The mixture was stirred for 2 h at 80°C and then rapidly cooled to 50°C and continuous reacted for another 1 h. The brown product was collected by magnetic separation, washed with water and alcohol six times and then freeze dried for 12 h. In the end,  $\text{CoFe}_2\text{O}_4$  was obtained for the subsequent experiments.

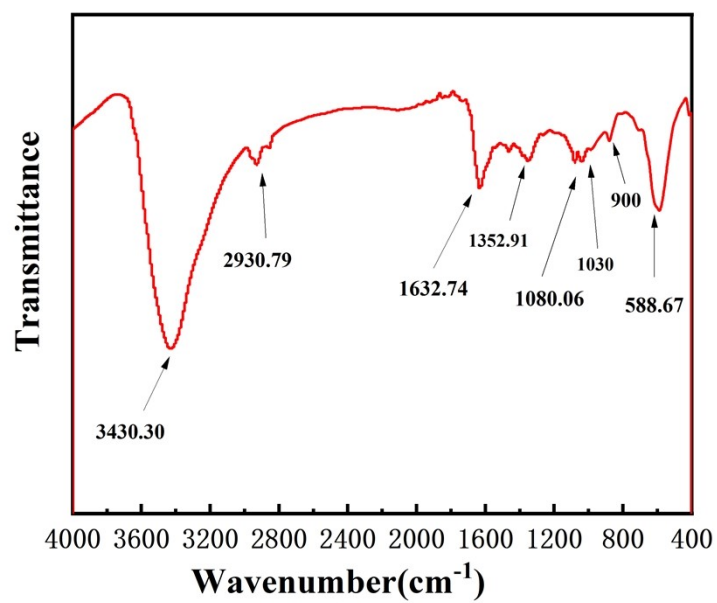

**Fig.S1** FT-IR image of CoFe<sub>2</sub>O<sub>4</sub>/rGO

**Fig.S2** Hysteresis line diagram of CoFe<sub>2</sub>O<sub>4</sub>/rGO

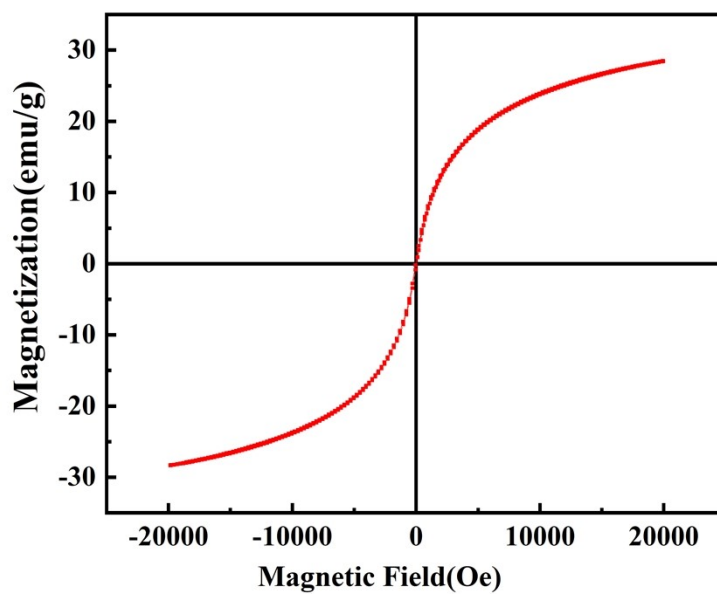

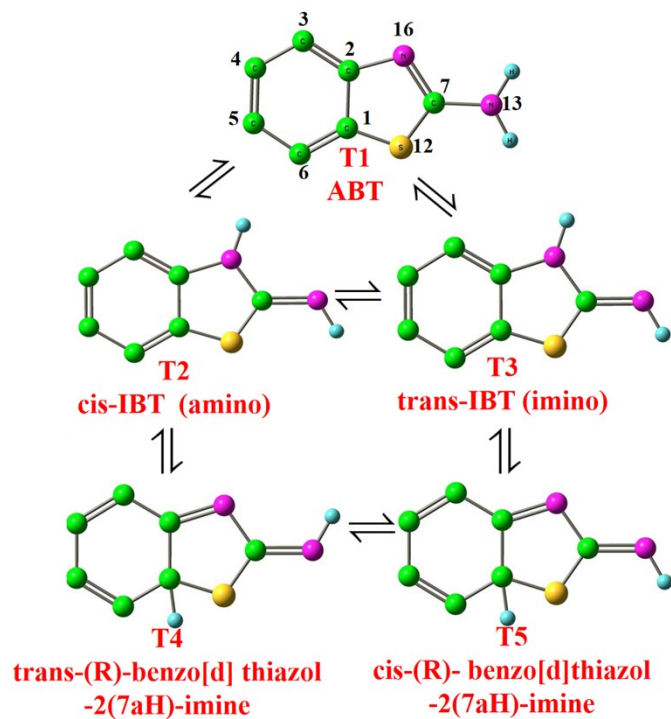

**Scheme S1** Schematic representation of proton transfer path for ABT in aqueous solution

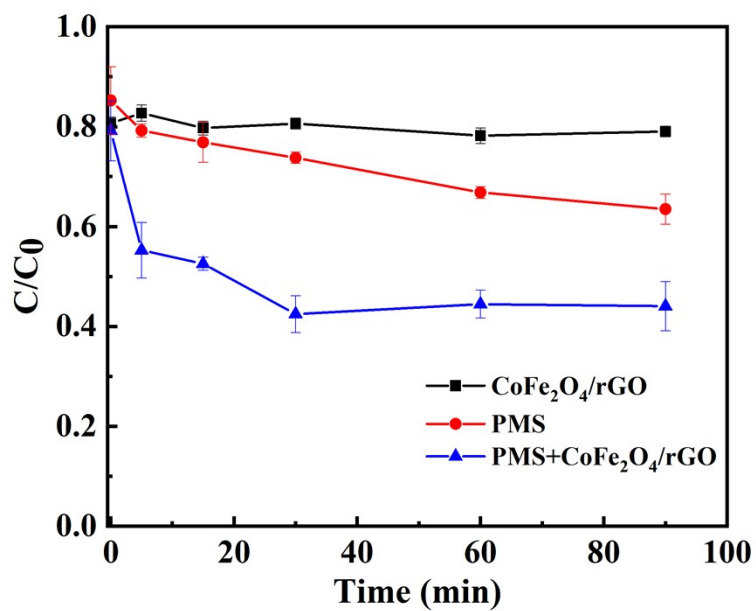

**Fig.S3** Removal efficiencies of three degradation system

Experiment conditions:  $c_{\text{ABT}}=10.0$  mg/L , Material amount =15.0 mg, pH=8.0,  $c_{\text{PMS}}=2.0$  mM

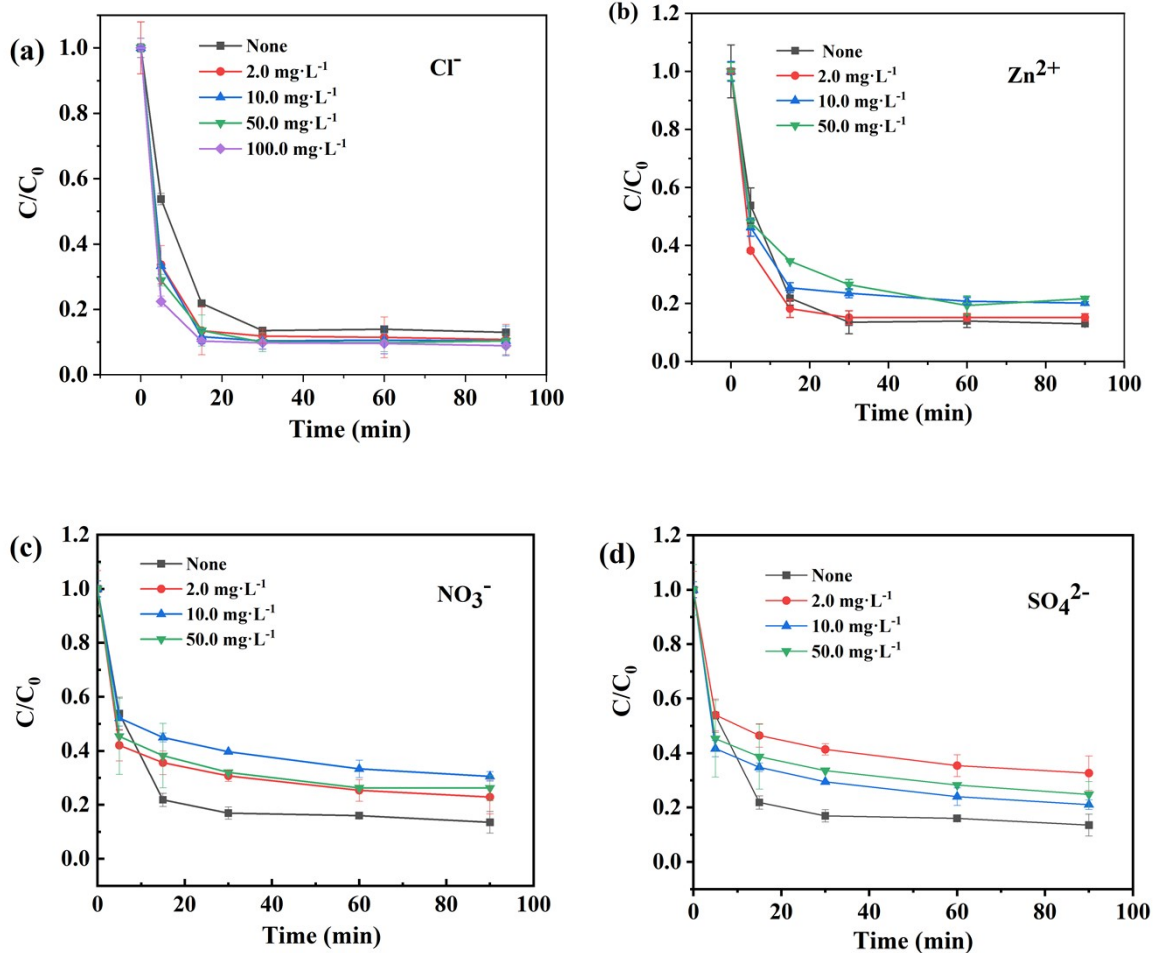

**Fig.S4** Effect of inorganic anions (Cl<sup>-</sup> (a), HCO<sub>3</sub><sup>-</sup> (b), NO<sub>3</sub><sup>-</sup> (c) and SO<sub>4</sub><sup>2-</sup> (d)) on degradation efficiency

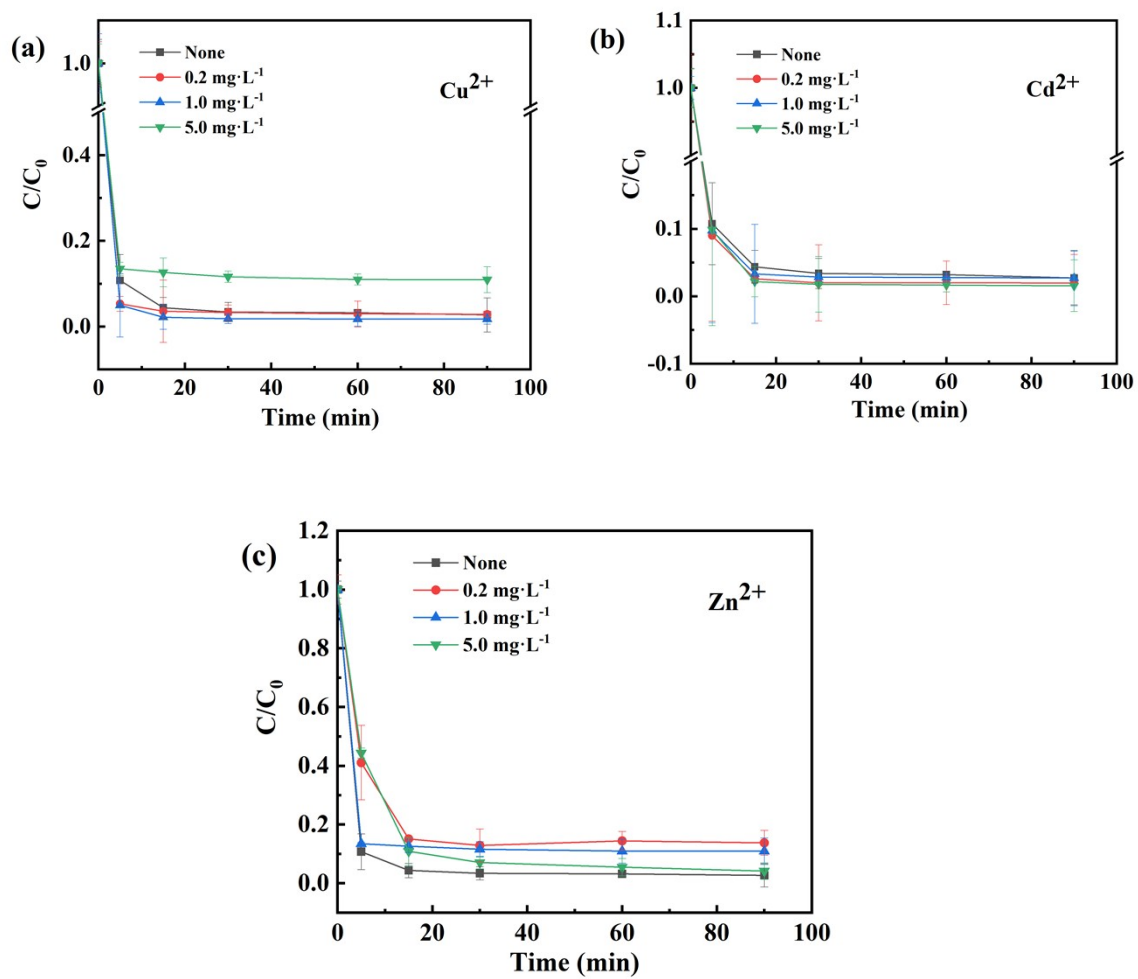

**Fig.S5.** Effect of metal cations ( $\text{Cu}^{2+}$ (a),  $\text{Cd}^{2+}$  (b) and  $\text{Zn}^{2+}$ (c)) on degradation efficiency

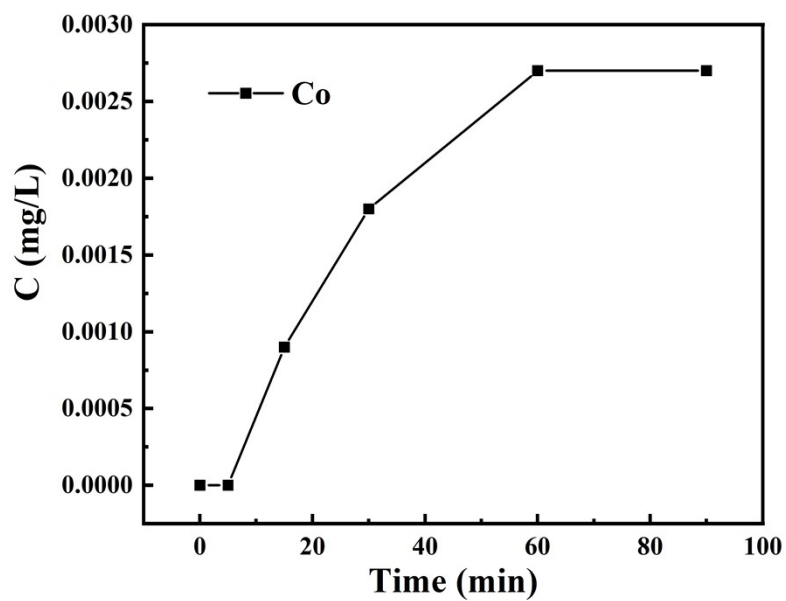

Fig.S6 Metal leaching diagram

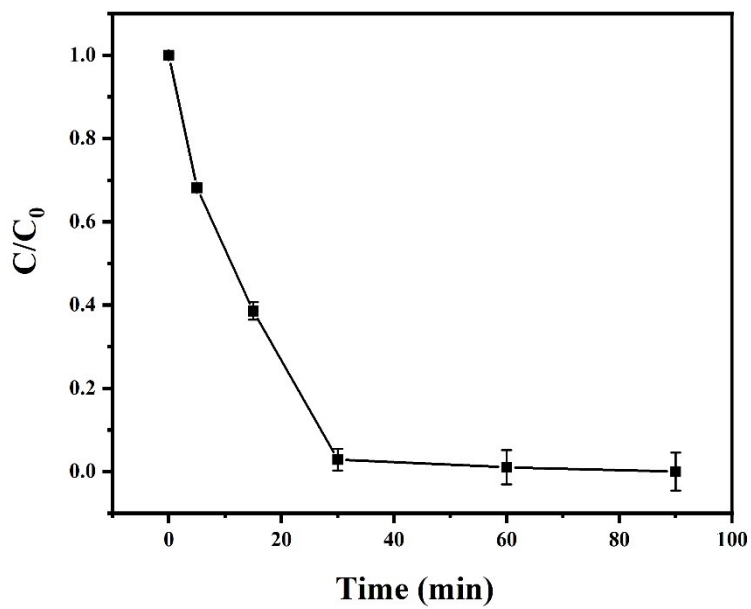

Fig.S7 Degradation rate of ABT in real water samples
